# Supplementary material for: A Novel Anti-CD44 Variant 9 Monoclonal Antibody C44Mab-1 Was Developed for Immunohistochemical Analyses against Colorectal Cancers
Source: MDPI journal article supplement (doi:10.3390/cimb45040238), 2023-04-20
Supplement: s1 [file s1]

**Table S1.** The determination of the binding epitope of C<sub>44</sub>Mab-1 by ELISA.

| Peptide      | Coding exon* | Sequence              | C <sub>44</sub> Mab-1 |
|--------------|--------------|-----------------------|-----------------------|
| CD44p21–40   | 2            | QIDLNITCRFAGVFHVEKNG  | –                     |
| CD44p31–50   | 2            | AGVFHVEKNGRYSISRTEAA  | –                     |
| CD44p41–60   | 2            | RYSISRTEAADLCKAFNSTL  | –                     |
| CD44p51–70   | 2            | DLCKAFNSTLPTMAQMEKAL  | –                     |
| CD44p61–80   | 2/3          | PTMAQMEKALSIGFETCRYG  | –                     |
| CD44p71–90   | 2/3          | SIGFETCRYGFIEGHVVIPR  | –                     |
| CD44p81–100  | 3            | FIEGHVVIPRIHPNSICAAN  | –                     |
| CD44p91–110  | 3            | IHPNSICAANNTGVYILTSN  | –                     |
| CD44p101–120 | 3            | NTGVYILTSNTSQYDTYCFN  | –                     |
| CD44p111–130 | 3/4          | TSQYDTYCFNASAPPEEDCT  | –                     |
| CD44p121–140 | 3/4          | ASAPPEEDCTSVTDLPNAFD  | –                     |
| CD44p131–150 | 4/5          | SVTDLPNAFDGPITITIVNR  | –                     |
| CD44p141–160 | 4/5          | GPITITIVNRDGTTRYVQKGE | –                     |
| CD44p151–170 | 5            | DGTTRYVQKGEYRTNPEDIYP | –                     |
| CD44p161–180 | 5            | YRTNPEDIYPSNPTDDDDVSS | –                     |
| CD44p171–190 | 5            | SNPTDDDDVSSGSSSERSSTS | –                     |
| CD44p181–200 | 5            | GSSSERSSTSGGYIFYTFST  | –                     |
| CD44p191–210 | 5            | GGYIFYTFSTVHPIPEDDSP  | –                     |
| CD44p201–220 | 5            | VHPIPEDSPWITDSTDRIIP  | –                     |
| CD44p211–230 | 5/v3         | WITDSTDRIIPATSTSSNTIS | –                     |
| CD44p221–240 | 5/v3         | ATSTSSNTISAGWEPNEENE  | –                     |
| CD44p231–250 | v3           | AGWEPNEENEDERDRHLSFS  | –                     |
| CD44p241–260 | v3           | DERDRHLSFSGSGIDDEDF   | –                     |
| CD44p251–270 | v3/v4        | GSGIDDEDFISSTISTTPR   | –                     |
| CD44p261–280 | v3/v4        | ISSTISTTPRAFDHTKQNQD  | –                     |
| CD44p271–290 | v4           | AFDHTKQNQDWTQWNPSHSN  | –                     |
| CD44p281–300 | v4           | WTQWNPSHSNPEVLLQTTR   | –                     |
| CD44p291–310 | v4/v5        | PEVLLQTTRMTDVRNGTT    | –                     |
| CD44p301–320 | v4/v5        | MTDVRNGTTAYEGNWNPEA   | –                     |
| CD44p311–330 | v5           | AYEGNWNPEAHPPLIHHEHH  | –                     |
| CD44p321–340 | v5           | HPPLIHHEHHHEEEETPHSTS | –                     |
| CD44p331–350 | v5/v6        | EEEEETPHSTSTIQATPSSTT | –                     |

|              |        |                      |   |
|--------------|--------|----------------------|---|
| CD44p341–360 | v5/v6  | TIQATPSSTTEETATQKEQW | – |
| CD44p351–370 | v6     | EETATQKEQWFGNRWHEGYR | – |
| CD44p361–380 | v6     | FGNRWHEGYRQTPREDSHST | – |
| CD44p371–390 | v6/v7  | QTPREDSHSTTGTAASAHT  | – |
| CD44p381–400 | v6/v7  | TGTAASAHTSHPMQGRTP   | – |
| CD44p391–410 | v7     | SHPMQGRTPSPEDSSWTF   | – |
| CD44p401–420 | v7     | SPEDSSWTFNPIHPMGR    | – |
| CD44p411–430 | v7/v8  | FNPISHPMGRGHQAGRRMDM | – |
| CD44p421–440 | v7/v8  | GHQAGRRMDMDSSHSTTLQP | – |
| CD44p431–450 | v8     | DSSHSTTLQPTANPNTGLVE | – |
| CD44p441–460 | v8     | TANPNTGLVEDLDRTGPLSM | – |
| CD44p451–470 | v8/v9  | DLDRTPGLSMTTQQSNSQSF | – |
| CD44p461–480 | v8/v9  | TTQQSNSQSFSTSHEGLEED | – |
| CD44p471–490 | v9     | STSHEGLEEDKDHPTTSTLT | + |
| CD44p481–500 | v9/v10 | KDHPTTSTLTSSNRNDVTGG | – |
| CD44p491–510 | v9/v10 | SSNRNDVTGGRRDPNHSEGS | – |
| CD44p501–520 | v10    | RRDPNHSEGSTTLLEGYTS  | – |
| CD44p511–530 | v10    | TTLLEGYTSHPHTKESRTF  | – |
| CD44p521–540 | v10    | YPHTKESRTFIPVTSKTS   | – |
| CD44p531–550 | v10    | IPVTSKTSFGVTAVTVGD   | – |
| CD44p541–560 | v10    | FGVTAVTVGDSNSNVNRSLS | – |
| CD44p551–570 | v10/16 | SNSNVNRSLSGDQDTFHPSG | – |
| CD44p561–580 | v10/16 | GDQDTFHPSGGSHHTHGS   | – |
| CD44p571–590 | 16     | GSHTTHGSESDGSHGSQEG  | – |
| CD44p581–600 | 16/17  | DGSHGSQEGGANTTSGPIR  | – |
| CD44p591–606 | 17     | GANTTSGPIRTPQIPEAAAA | – |

+, OD655 $\geq$ 0.3; –, OD655<0.1

\*The CD44 exon-coding regions are illustrated in Figure 1.
