# Supplementary material for: A Novel Anti-CD44 Variant 9 Monoclonal Antibody C44Mab-1 Was Developed for Immunohistochemical Analyses against Colorectal Cancers
Source: MDPI journal article supplement (doi:10.3390/cimb45040238), 2023-04-20
Supplement: s1 [file s1]

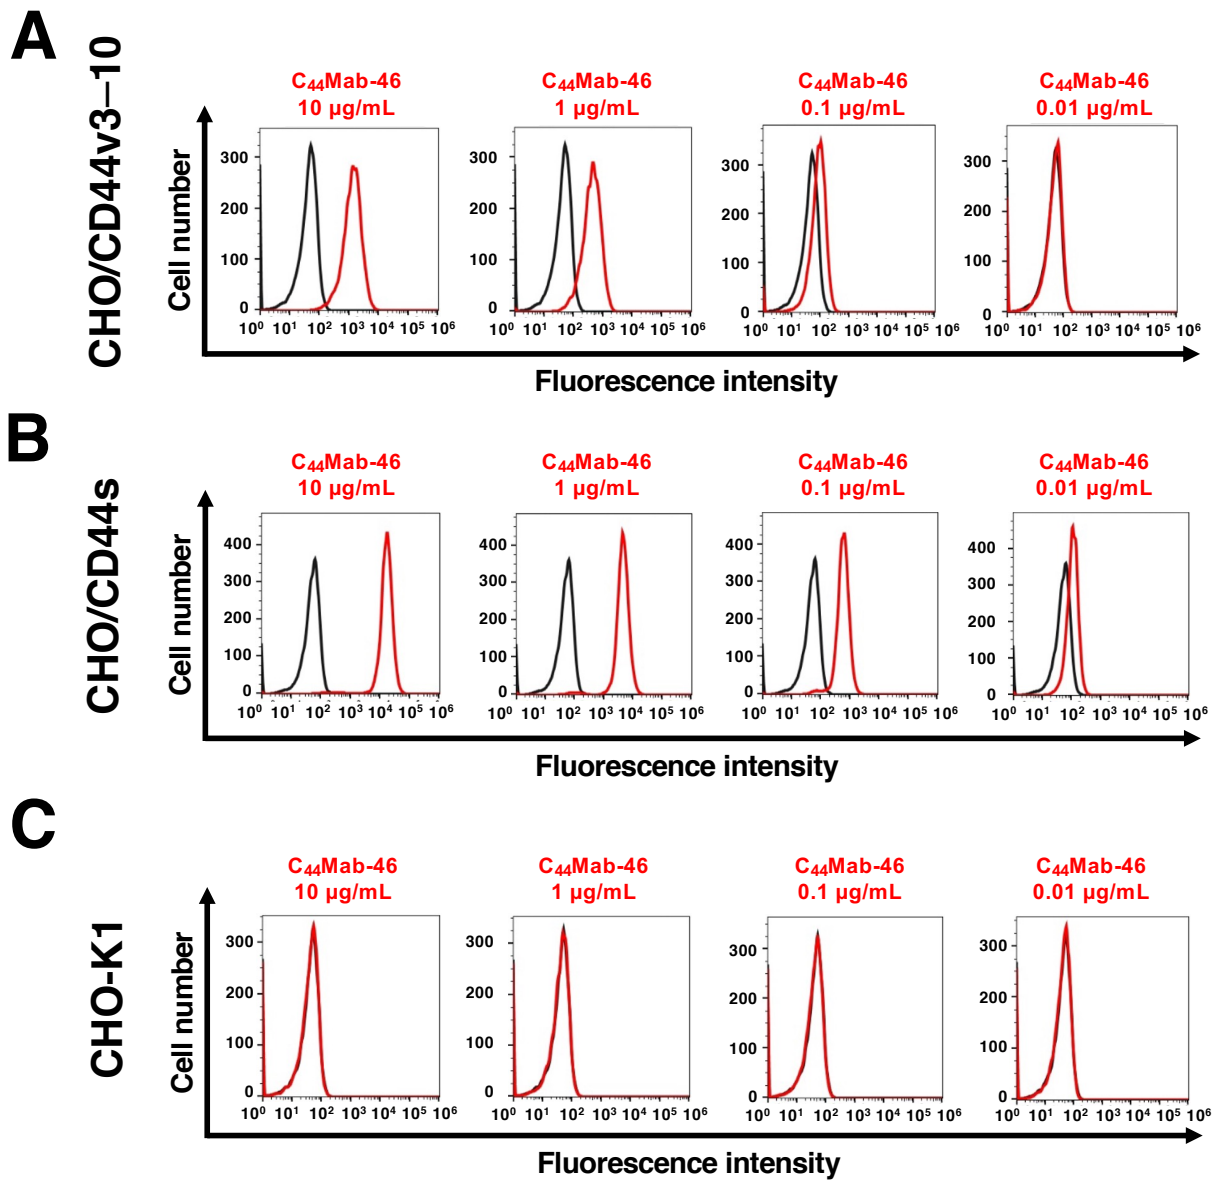

**Figure S1** Conformation of the recognition of CHO/CD44s and CHO/CD44v3-10 by C<sub>44</sub>Mab-46 by flow cytometry. CHO/CD44v3-10 (A), CHO/CD44s (B), and CHO-K1 (C) were treated with 0.01-10  $\mu\text{g/mL}$  of C<sub>44</sub>Mab-46, followed by treatment with Alexa Fluor 488-conjugated anti-mouse IgG (Red line). The black line represents the negative control (blocking buffer).

**C<sub>44</sub>Mab-1**

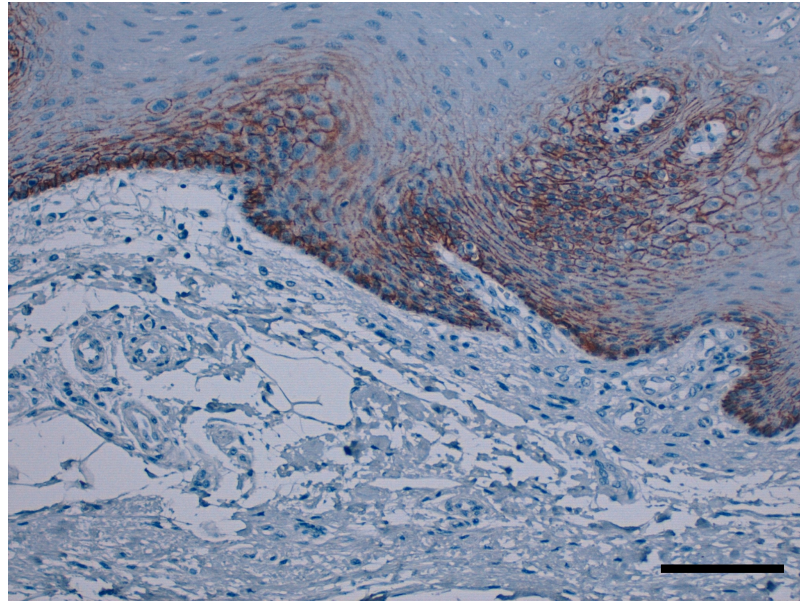

**C<sub>44</sub>Mab-46**

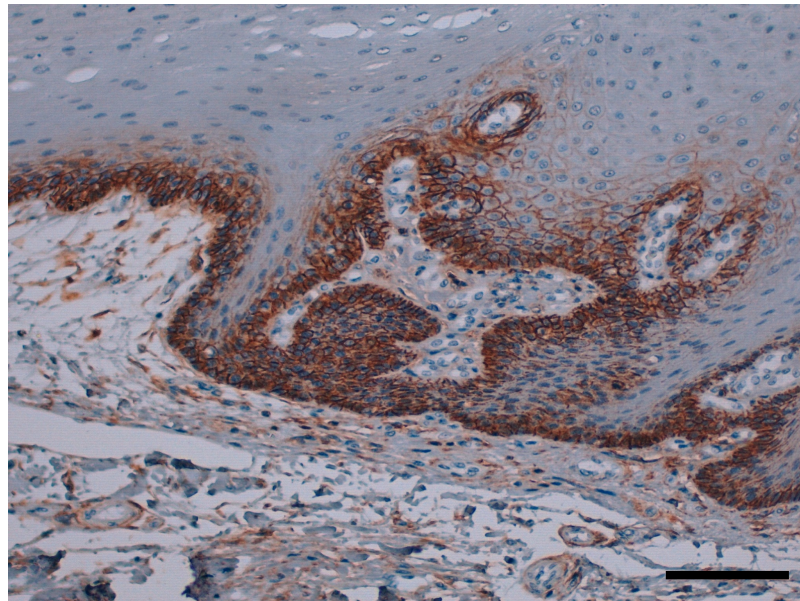

**Figure S2** Immunohistochemical analysis using C<sub>44</sub>Mab-1 and C<sub>44</sub>Mab-46 against oral squamous cell carcinoma tissues. After antigen retrieval, the sections were incubated with 1  $\mu$ g/mL of C<sub>44</sub>Mab-1 (A) and 1  $\mu$ g/mL of C<sub>44</sub>Mab-46 (B), followed by treatment with the Envision+ kit. The color was developed using 3,3'-diaminobenzidine tetrahydrochloride (DAB), and the sections were counterstained with hematoxylin. Scale bar = 100  $\mu$ m.



**A****C<sub>44</sub>Mab-1**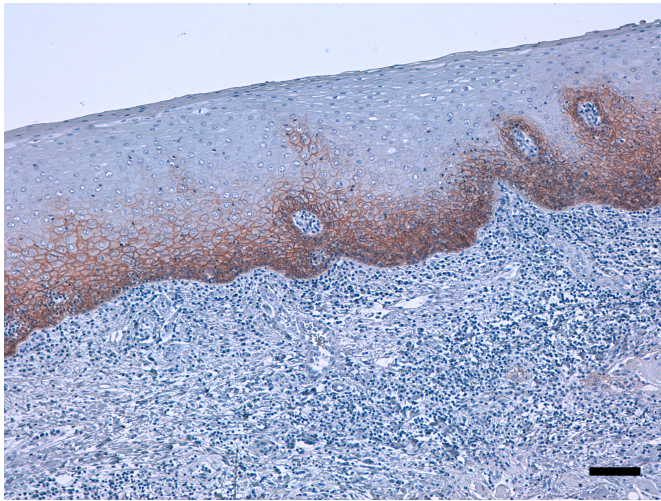**oral SCC****C<sub>44</sub>Mab-1 + p471-490 peptide**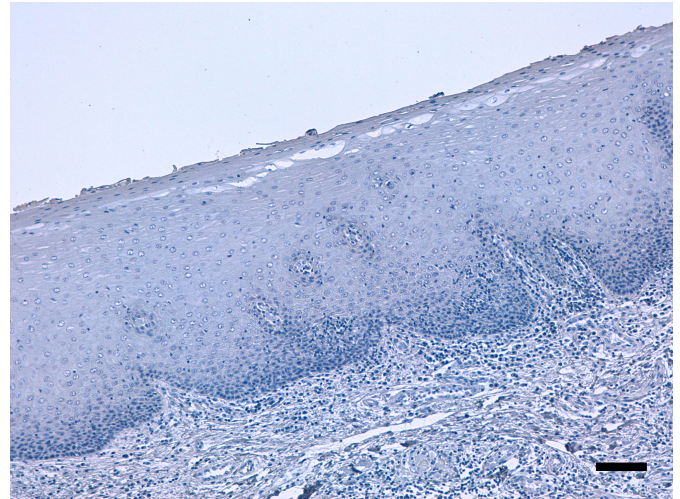**oral SCC****B****PMab-44 (Isotype control)**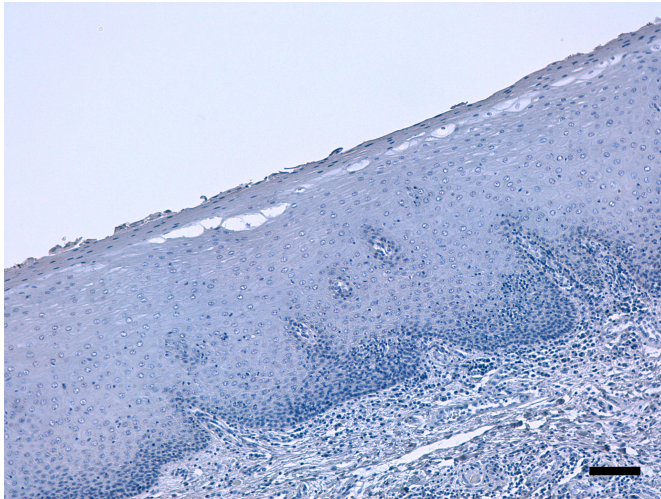**oral SCC****C****C<sub>44</sub>Mab-1**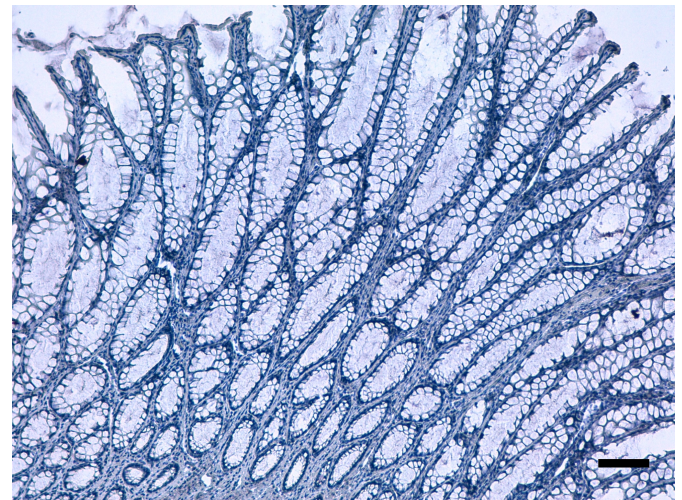**cat rectum  
(negative tissue control)**

**Figure S3** The blocking assay by an epitope peptide, isotype control, and negative tissue control in immunohistochemistry. (A) Blocking of the C<sub>44</sub>Mab-1 reactivity to oral SCC tissue (positive tissue control) by the CD44 peptide (aa 471–490) containing the C<sub>44</sub>Mab-1 epitope. After antigen retrieval, sections were incubated with C<sub>44</sub>Mab-1 (1 µg/mL) or C<sub>44</sub>Mab-1 (1 µg/mL) plus human CD44 peptide (aa 471–490, 10 µg/mL). (B) The oral SCC tissue section was incubated with an isotype control mAb, PMab-44 (1 µg/mL). (C) A negative control tissue section (cat rectum) was incubated with C<sub>44</sub>Mab-1 (1 µg/mL). The tissues were further treated with the Envision+ kit. The color was developed using DAB, and sections were counterstained with hematoxylin. Scale bar = 100 µm.
